# Supplementary material for: Separation and quantification of cysteine, glutathione and phytochelatins in rice (Oryza sativa L.) upon cadmium exposure using reverse phase ultra performance liquid chromatography (RP-UPLC) with fluorescence detection
Source: Royal Society of Chemistry journal article supplement (doi:10.1039/c3ay40849c), 2013-01-01
Supplement: c3ay40849c.pdf [file c3ay40849c.pdf]

## Electronic Supplementary Information

### Supplemental Figures

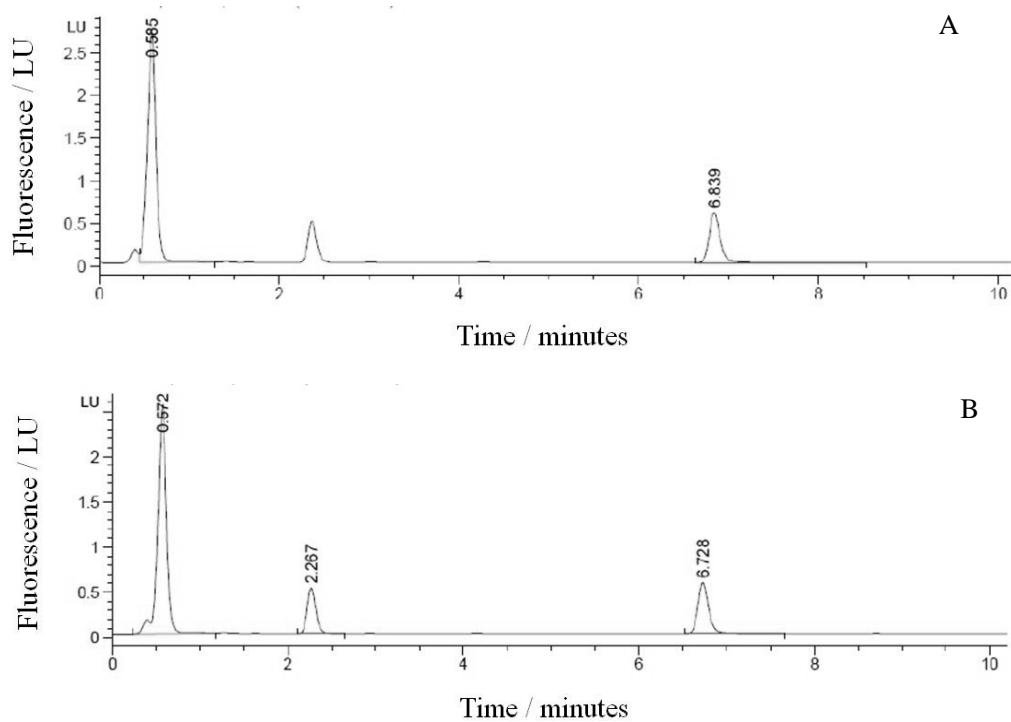

Supplemental Fig. 1. Chromatogram of a blank sample without (A) and with (B) the addition of TCEP (without mBBr derivatization).

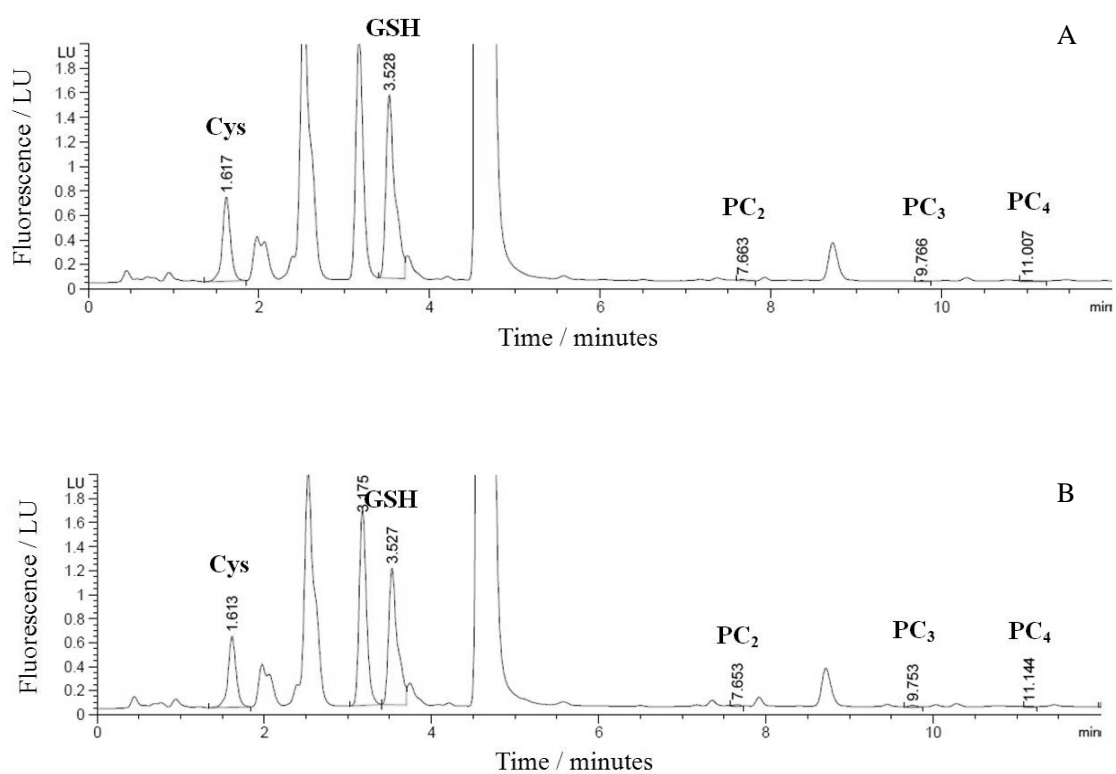

Supplemental Fig. 2. Separation profiles of mBBr derivatized thiols in the control (A) and 1 μM Cd treated (B) rice leaf samples.

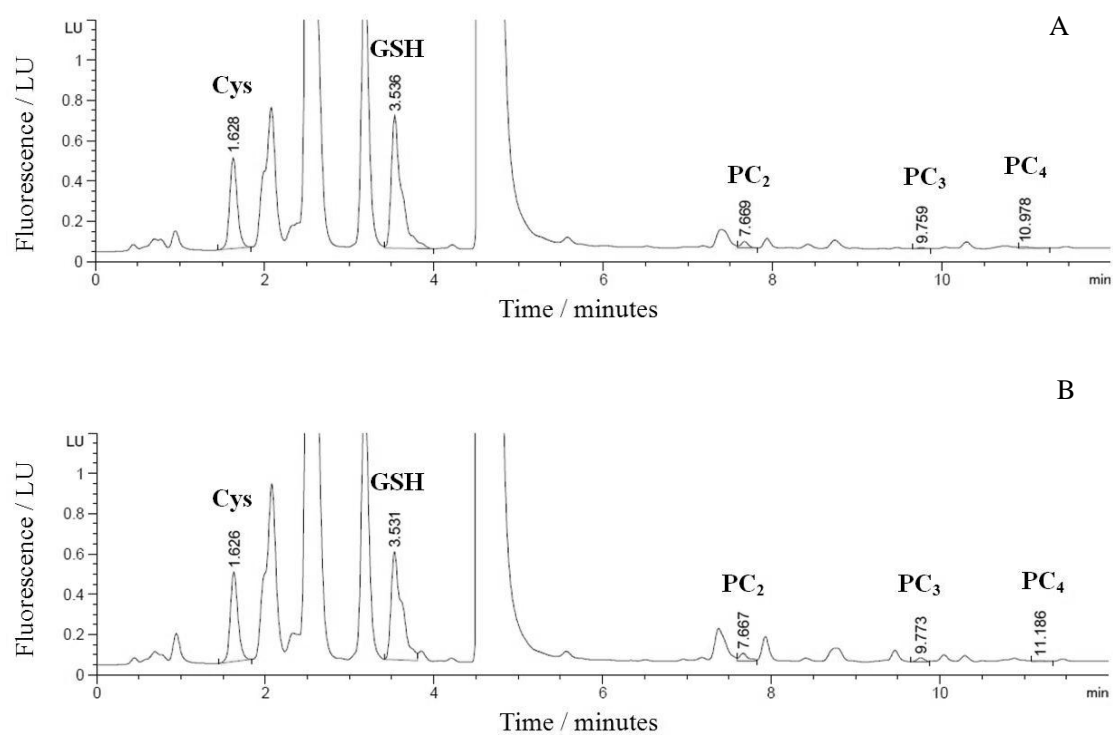

Supplemental Fig. 3. Separation profiles of mBBR derivatized thiols in the control (A) and 1  $\mu$ M Cd treated (B) rice stem samples.

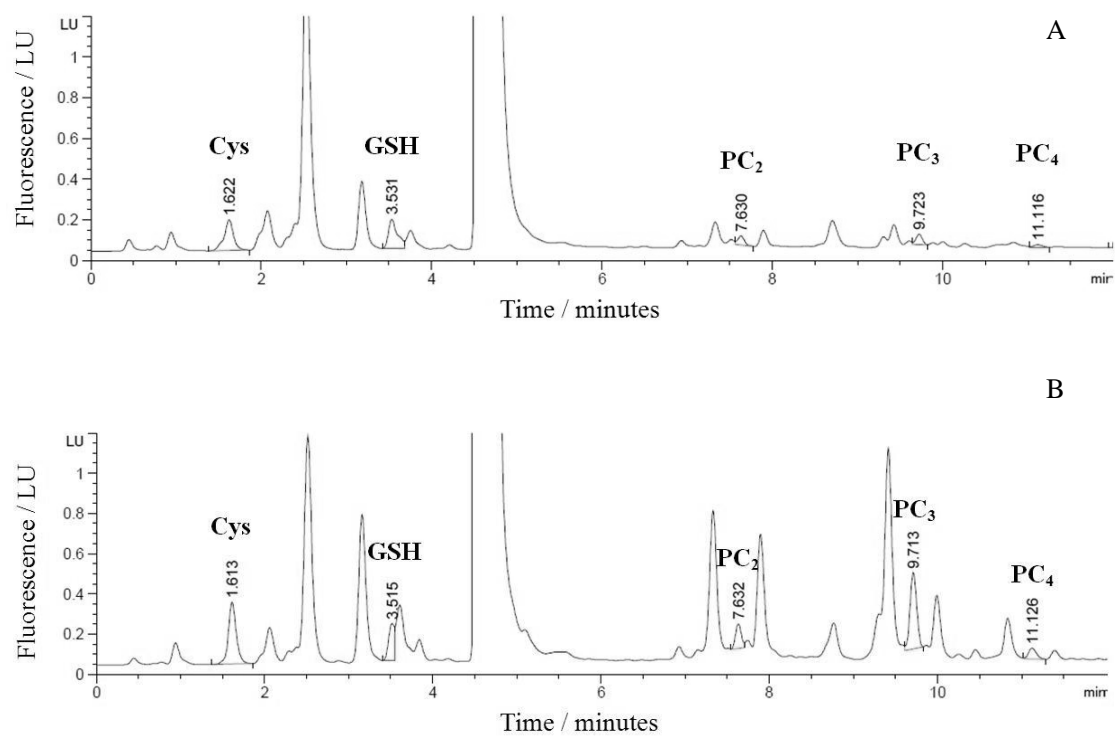

Supplemental Fig. 4. Separation profiles of mBBr derivatized thiols in the control (A) and 1 μM Cd treated (B) rice root samples.

## Supplemental table

Supplemental Table 1: Linearity and  $r^2$  values for mixed thiol standards (1-20  $\mu\text{g}\cdot\text{mL}^{-1}$ )

| Component name  | Retention time | Linear regression |           |        |
|-----------------|----------------|-------------------|-----------|--------|
|                 | (min)          | Slope             | Intercept | $r^2$  |
| Cys             | 2.068          | 0.4523            | 0.0311    | 0.9999 |
| GSH             | 3.521          | 0.2256            | 0.0430    | 0.9997 |
| PC <sub>2</sub> | 7.619          | 0.1643            | 0.0079    | 0.9999 |
| PC <sub>3</sub> | 9.709          | 0.1314            | -0.0390   | 0.9999 |
| PC <sub>4</sub> | 11.106         | 0.0645            | -0.0081   | 0.9997 |
